# Supplementary material
Source: PubMed Central journal article supplement (PMC10681237)
Supplement: NIHMS1941302-supplement-2.pdf [file NIHMS1941302-supplement-2.pdf]

## ■ ASSOCIATED CONTENT

### Data Availability Statement

The data underlying this study are available in the published article and its [Supporting Information](#).

### SI Supporting Information

The Supporting Information is available free of charge at <https://pubs.acs.org/doi/10.1021/acs.orglett.2c03922>.

Experimental procedures, full spectroscopic data, NMR spectra, computational details, and additional bioassay data for **1** and **2** (PDF)
